# Supplementary material
Source: publisher figshare collection journal article supplement (https://acs.figshare.com/ndownloader/files/4118158)
Supplement: Supplementary file 1 [file 4118158]

## Supporting Information

### Caption of Figures:

**Fig. S1.** Formation energies of  $\text{Li}_x\text{Mn}_2\text{O}_4$  with Li occupying 2a, 2b, 4e, 8h and 8h' sites show the stability following  $8h > 8h' > 4e > 2a > 2b$ .

**Fig. S2.** Lattice constant  $c$  of  $\text{Li}_x\text{Mn}_2\text{O}_4$ .

**Fig. S3.** Evolution of  $\gamma$  for  $\text{Li}_x\text{Mn}_2\text{O}_4$ . The largest deviation between  $\gamma$  and  $90^\circ$  is  $1.0^\circ$ , suggesting the structure remains at near-orthorhombic symmetry. For simplicity we regard the symmetry as “orthorhombic” in the manuscript.

**Fig. S4.** Relative energy difference between  $\text{Li}_{2x}\text{MnO}_{2+x}$  configurations with Li(O) occupying 8h(2a) and the most stable configurations in which Li(O) occupies 8h'(2b) sites.

**Fig. S5.** Partial Density of States for (a) pristine  $\text{MnO}_2$  and (b)  $0.25\text{Li}_2\text{O} \cdot \text{MnO}_2$ . Blue: Mn, Red: framework O, Green: inserted O. For pristine  $\text{MnO}_2$ , the valence band edge is mainly composed of occupied Mn 3d orbitals, while the conduction band edge is composed of both unoccupied Mn 3d and O 2p orbitals. For  $0.25\text{Li}_2\text{O} \cdot \text{MnO}_2$  the occupied band near Fermi energy is mainly composed of Mn 3d and framework O 2p orbitals, with minor contribution from inserted O 2p orbitals.

**Fig. S6.** Density of States for (a) pristine  $\text{MnO}_2$  and (b)  $0.25\text{Li}_2\text{O} \cdot \text{MnO}_2$ . For pristine  $\text{MnO}_2$ , the valence band edge is mainly composed of occupied Mn 3d orbitals, while the conduction band edge is composed of both unoccupied Mn 3d and O 2p orbitals. For  $0.25\text{Li}_2\text{O} \cdot \text{MnO}_2$  the occupied band near Fermi energy is mainly composed of Mn 3d and framework O 2p orbitals, with minor contribution from inserted O 2p orbitals.

**Fig. S7.** Decomposed Density of States projected on d-orbitals of Mn ions in  $\text{LiMn}_2\text{O}_4$

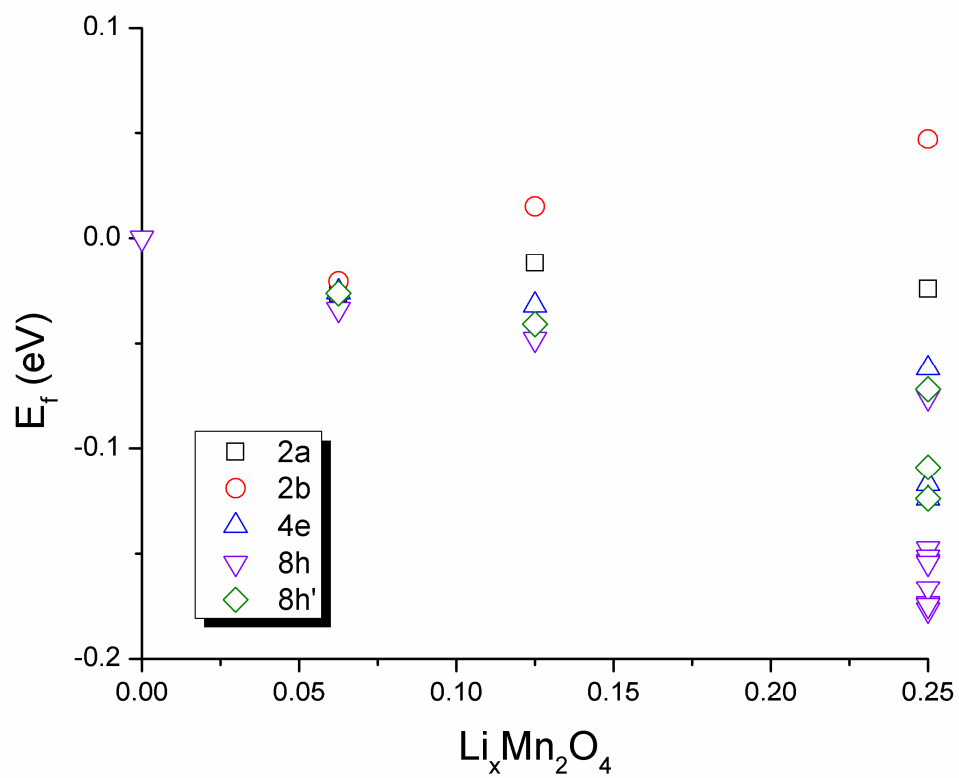

**Fig. S1.** Formation energies of  $\text{Li}_x\text{Mn}_2\text{O}_4$  with Li occupying 2a, 2b, 4e, 8h and 8h' sites show the stability following  $8h > 8h' > 4e > 2a > 2b$ .

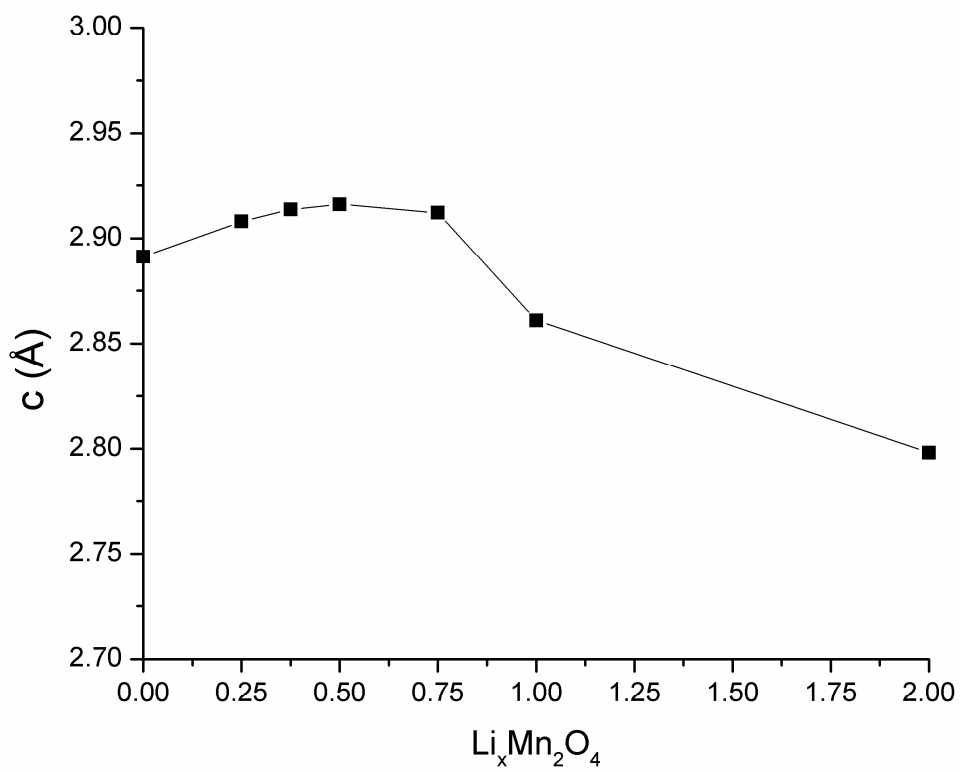

**Fig. S2.** Lattice constant  $c$  of  $\text{Li}_x\text{Mn}_2\text{O}_4$ .

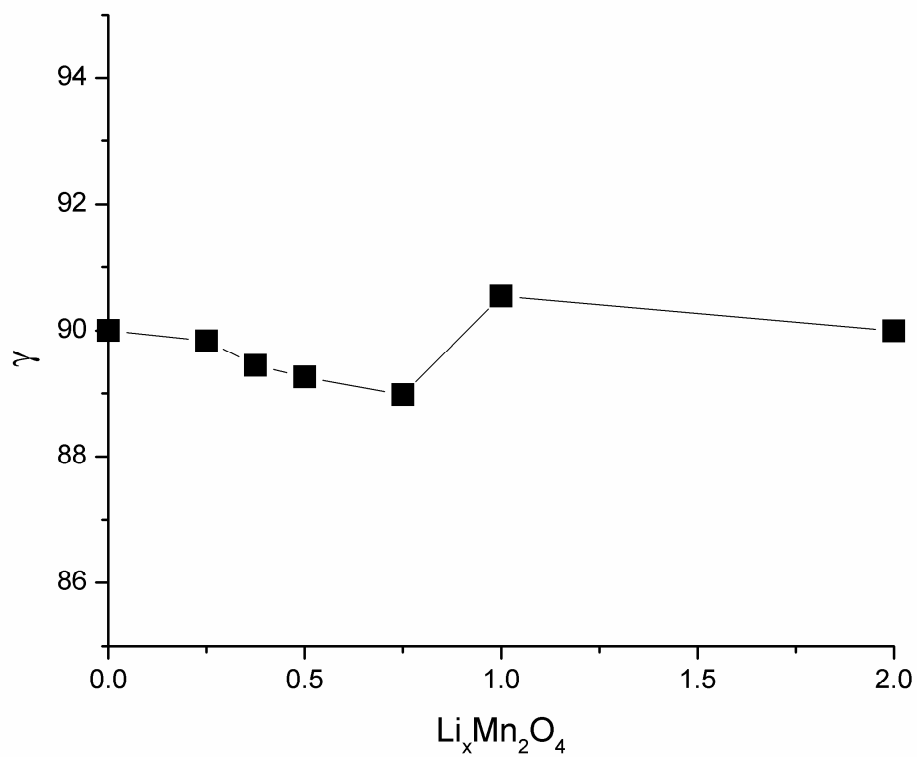

**Fig. S3.** Evolution of  $\gamma$  for  $\text{Li}_x\text{Mn}_2\text{O}_4$ . The largest deviation between  $\gamma$  and  $90^\circ$  is  $1.0^\circ$ , suggesting the structure remains at near-orthorhombic symmetry. For simplicity we regard the symmetry as “orthorhombic” in the manuscript.

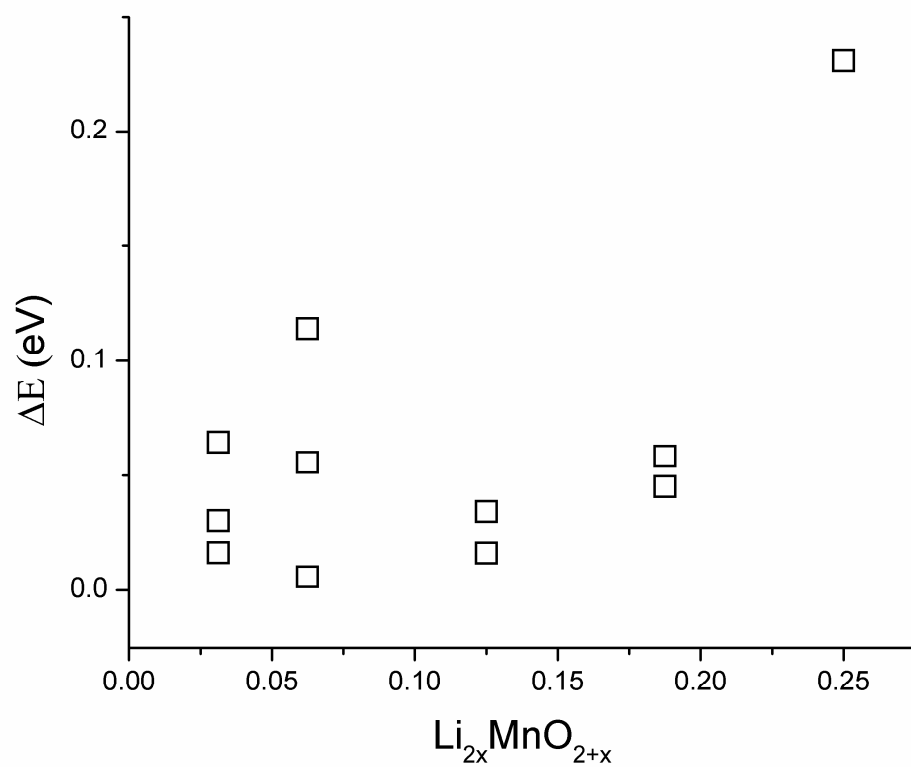

**Fig. S4.** Relative energy difference between  $\text{Li}_{2x}\text{MnO}_{2+x}$  configurations with Li(O) occupying 8h(2a) and the most stable configurations with Li(O) occupying 8h'(2b) sites.

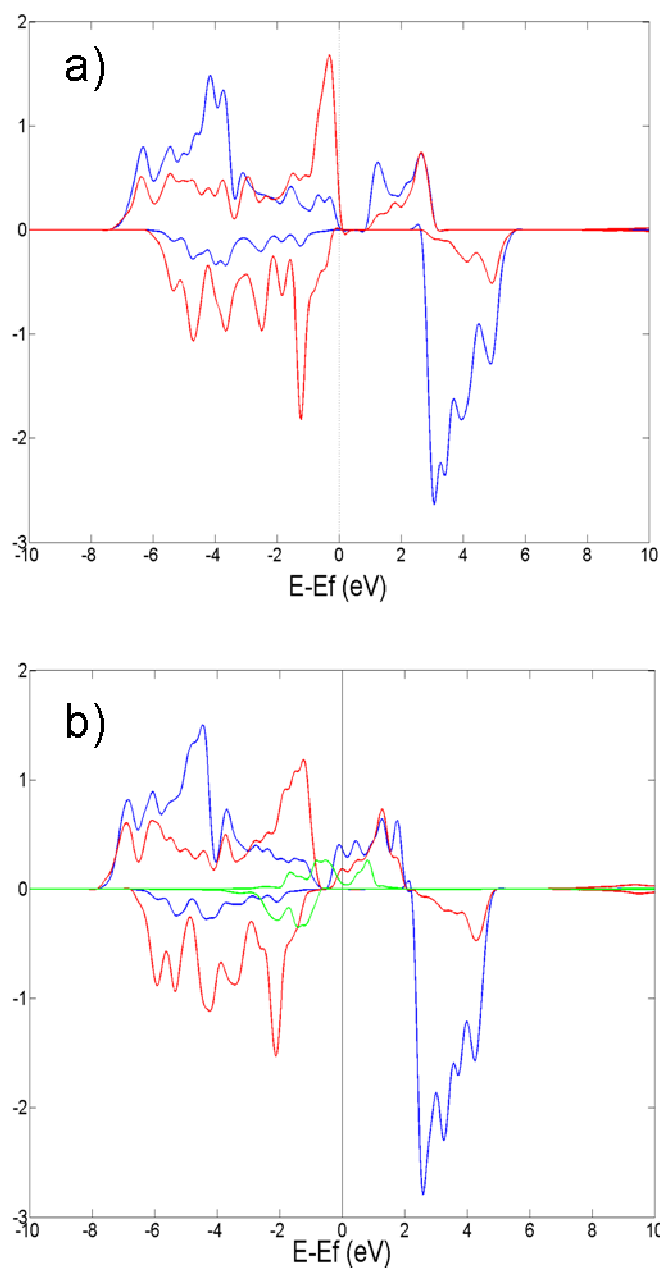

**Fig. S5.** Partial Density of States for (a) pristine  $\text{MnO}_2$  and (b)  $0.25\text{Li}_2\text{O}\cdot\text{MnO}_2$ . Blue: Mn, Red: framework O, Green: inserted O. For pristine  $\text{MnO}_2$ , the valence band edge is mainly composed of occupied Mn 3d orbitals, while the conduction band edge is composed of both unoccupied Mn 3d and O 2p orbitals. For  $0.25\text{Li}_2\text{O}\cdot\text{MnO}_2$  the occupied band near Fermi energy is mainly composed of Mn 3d and framework O 2p orbitals, with minor contribution from inserted O 2p orbitals.

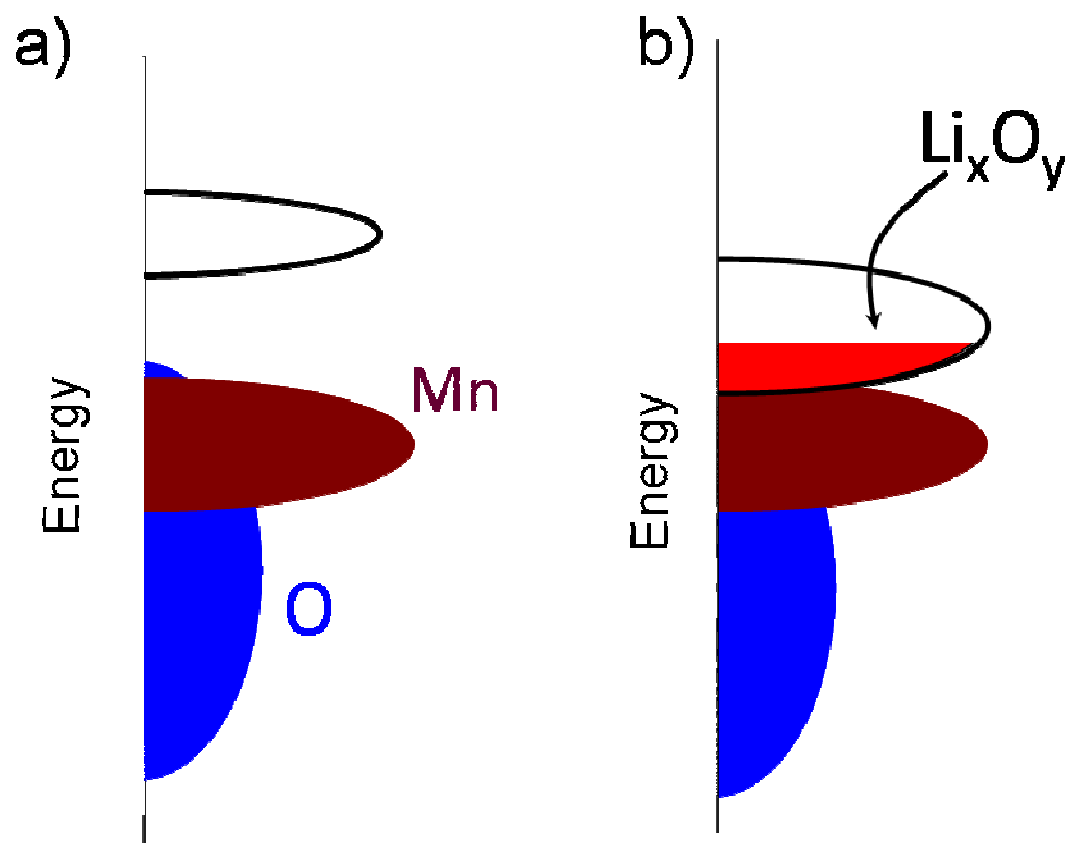

**Fig. S6.** Schematic of the change of the band structure from (a) pristine  $\alpha\text{MnO}_2$  to (b)  $\text{Li}_x\text{O}_y$  inserted  $\alpha\text{MnO}_2$ .

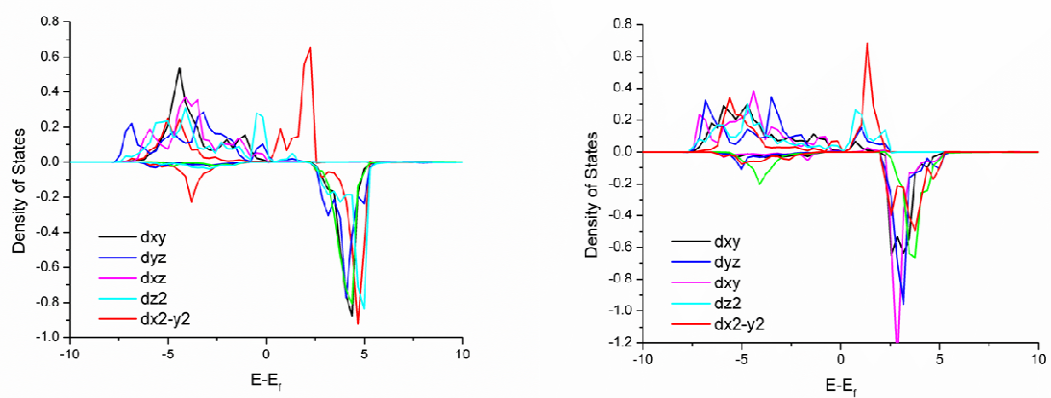

**Fig. S7.** Decomposed Density of States projected on d-orbitals of Mn ions in LiMn<sub>2</sub>O<sub>4</sub>
